# Supplementary material for: Preparation of 3D cerium-based coordination polymer microstructures and their conversion to ceria
Source: Royal Society of Chemistry journal article supplement (doi:10.1039/c3ce41996g), 2013-11-04
Supplement: c3ce41996g.pdf [file c3ce41996g.pdf]

## Supporting information

Table S1 Samples and Corresponding Experimental Parameters.

| Sample | Reaction time (h) | Reaction Temperature (°C) | n (Ce <sup>3+</sup> ) (mmol) | n (BTTA) (mmol) | Molar ratio of Ce <sup>3+</sup> and BTTA |
|--------|-------------------|---------------------------|------------------------------|-----------------|------------------------------------------|
| 1      | 6                 | 120                       | 0.1                          | 0.1             | 1:1                                      |
| 2      | 6                 | 80                        | 0.1                          | 0.1             | 1:1                                      |
| 3      | 6                 | 100                       | 0.1                          | 0.1             | 1:1                                      |
| 4      | 6                 | 160                       | 0.1                          | 0.1             | 1:1                                      |
| 5      | 6                 | 200                       | 0.1                          | 0.1             | 1:1                                      |
| 6      | 0.75              | 120                       | 0.1                          | 0.1             | 1:1                                      |
| 7      | 2                 | 120                       | 0.1                          | 0.1             | 1:1                                      |
| 8      | 4                 | 120                       | 0.1                          | 0.1             | 1:1                                      |
| 9      | 6                 | 120                       | 0.1                          | 0.2             | 1:2                                      |
| 10     | 6                 | 120                       | 0.1                          | 0.3             | 1:3                                      |

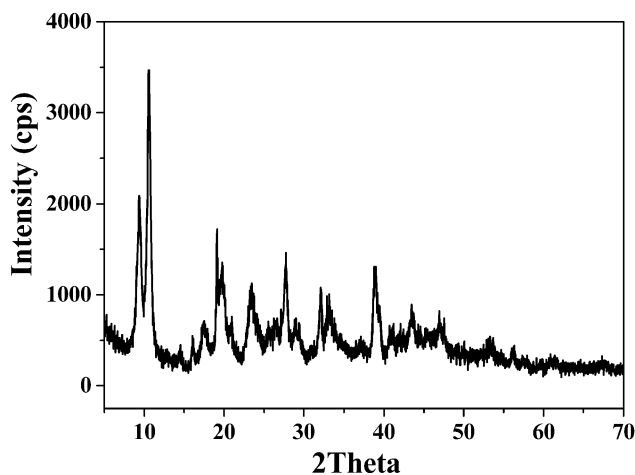

Fig. S1 XRD pattern of sample 1.

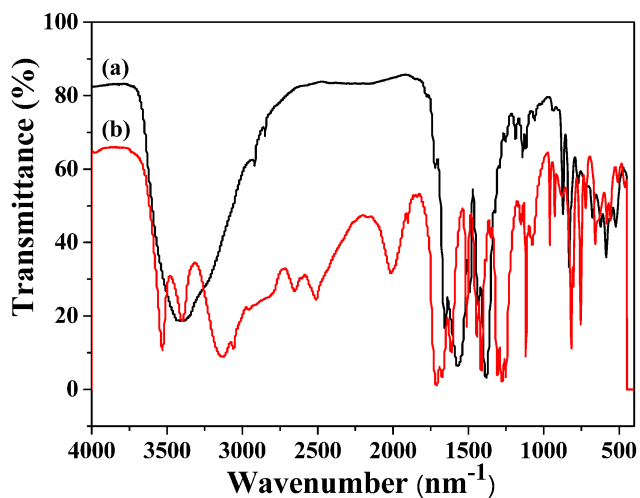

Fig. S2 FT-IR spectrums of the (a) sample 1 and (b) BTTA.

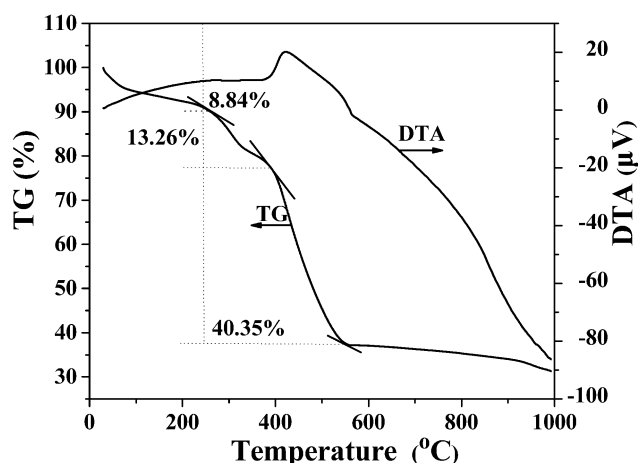

Fig. S3 TG-DTA curves of sample 1.

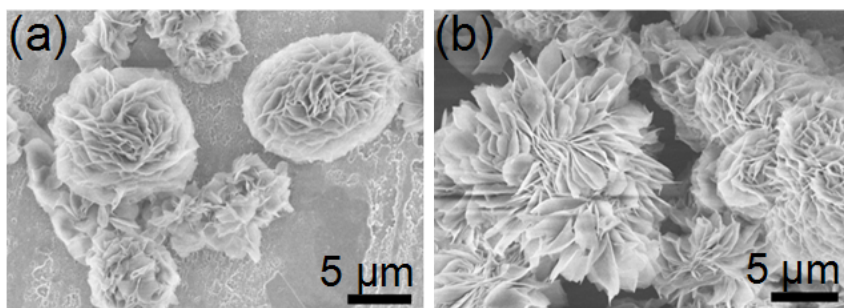

Fig. S4 SEM images of the as-prepared product: the ratio of  $\text{Ce}(\text{NO}_3)_3 \cdot 6\text{H}_2\text{O}$  to BTTA is 1:2 (sample 13), 1:3 (sample 14) separately.

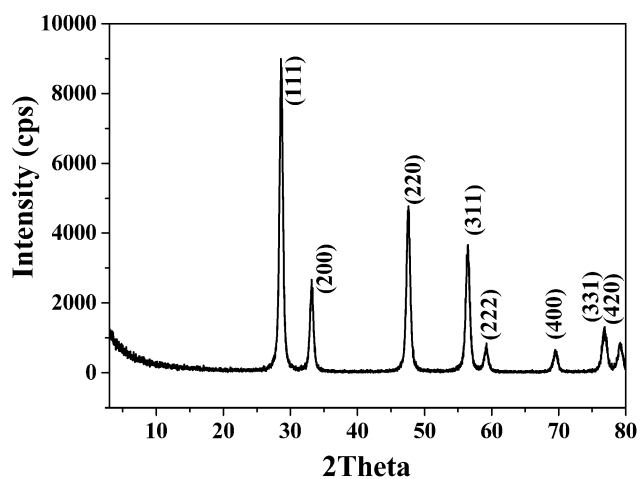

Fig. S5 XRD pattern of the flowerlike ceria.

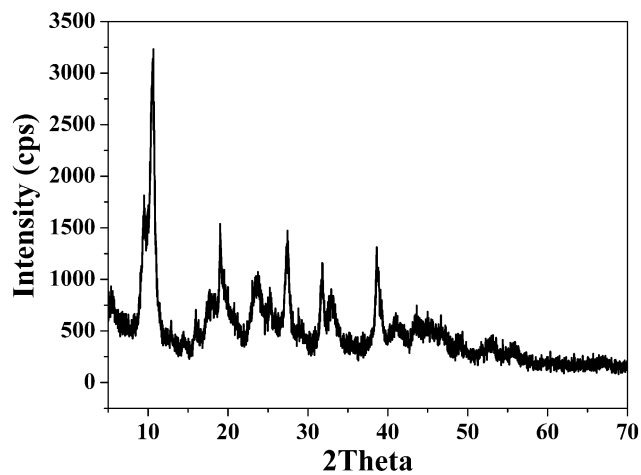

Fig. S6 XRD pattern of the flowerlike La-BTTA.

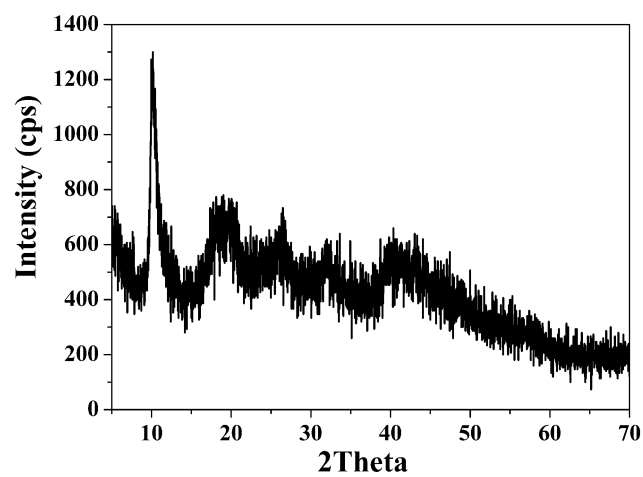

Fig. S7 XRD pattern of the flowerlike Gd-BTTA.

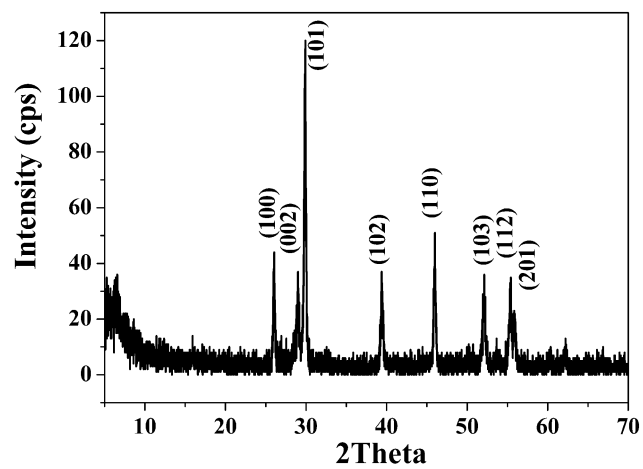

Fig. S8 XRD pattern of the product prepared after calcining the flowerlike La-BTTA at 600 °C for 4 h.

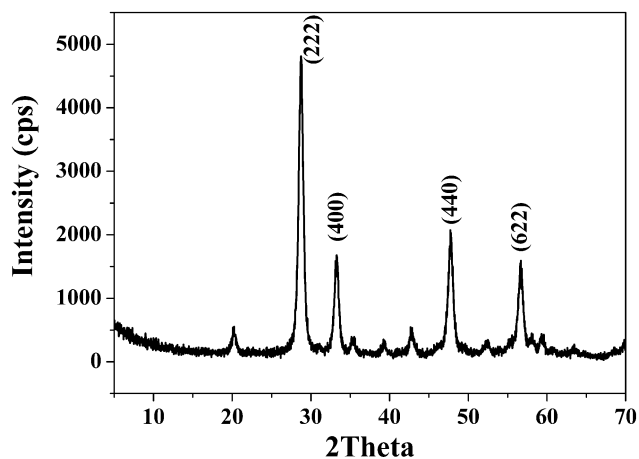

Fig. S9 XRD pattern of the product prepared after calcining the flowerlike Gd-BTTA at 600 °C for 4 h.

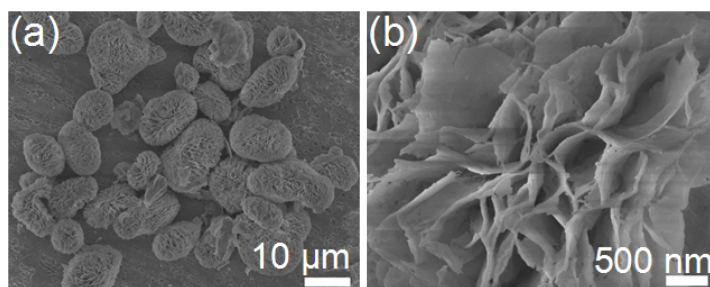

Fig. S10 SEM images of  $\text{La}_2\text{O}_3$  obtained after calcinations of La-BTTA in air at 600 °C.

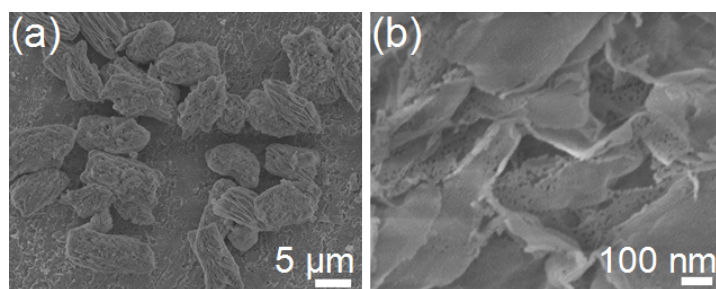

Fig. S11 SEM images of the  $\text{Gd}_2\text{O}_3$  obtained after calcinations of Gd-BTTA in air at 600 °C.
